# Supplementary material
Source: publisher figshare collection journal article supplement (https://acs.figshare.com/ndownloader/files/23198900)
Supplement: Supplementary file 1 [file 23198900]

Compound name;SMILES
;
(S)-ketoprofen;C[C@H](C(O)=O)c1cccc(c1)C(=O)c1ccccc1
(S)-ibuprofen;CC(C)Cc1ccc(cc1)[C@H](C)C(O)=O
(S)-etodolac;CCc1cccc2c3CCO[C@@](CC)(CC(O)=O)c3[nH]c12
(R)-etodolac;CCc1cccc2c3CCO[C@](CC)(CC(O)=O)c3[nH]c12
Nabumetone;COc1ccc2cc(CCC(C)=O)ccc2c1
6-MNA;COc1ccc2cc(CC(O)=O)ccc2c1
